# Supplementary material for: Cancer stem cells are underestimated by standard experimental methods in clear cell renal cell carcinoma
Source: PubMed Central journal article supplement (PMC4848484; doi:10.1038/srep25220), 2016-04-28
Supplement: srep25220-s1.pdf [file srep25220-s1.pdf]

## **Supplementary Information**

### **Cancer stem cells are underestimated by standard experimental methods in clear cell renal cell carcinoma**

Craig Gedye <sup>\*1,2</sup>, Danylo Sirskyj<sup>2</sup>, Nazleen Lobo<sup>2</sup>, Jalna Meens<sup>2</sup>, Elzbieta Hyatt<sup>3</sup>, Michael Robinette<sup>2</sup>, Neil Fleshner<sup>2</sup>, Robert J Hamilton<sup>2</sup>, Girish Kulkarni<sup>2</sup>, Alexandre Zlotta<sup>2</sup>, Andrew Evans<sup>2</sup>, Antonio Finelli<sup>2</sup>, Michael AS Jewett<sup>2</sup>, and Laurie E Ailles <sup>\*2,4</sup>

#### **Includes:**

Supplementary Table 1

Supplementary Figures 1 to 11

**Supplementary Table 1. Patient Samples Employed in This Study**

| RCC# | Gender | Reported Histology                          | T   | N | M | G | Flow cytometry | Cell line | Subcutaneous fragments | Renal capsule fragments | Renal capsule injections | Co-injections | Clonogenicity | Annexin-V | Caspase/TUNEL staining | Apoikis-ROCKi | Lysis buffer | Immunofluorescence |
|------|--------|---------------------------------------------|-----|---|---|---|----------------|-----------|------------------------|-------------------------|--------------------------|---------------|---------------|-----------|------------------------|---------------|--------------|--------------------|
|      |        |                                             |     |   |   |   |                |           |                        |                         |                          |               |               |           |                        |               |              |                    |
| 8    | F      | Clear cell                                  | 1a  | X | X | 2 | O              |           |                        |                         |                          |               |               |           |                        |               |              |                    |
| 13   | M      | Clear cell                                  | 1b  | X | X | 2 |                |           |                        |                         |                          |               |               |           |                        |               |              | O                  |
| 16   | F      | Clear cell                                  | 2   | X | X | 2 | O              |           |                        |                         |                          |               |               |           |                        |               |              | O                  |
| 20   | M      | Clear cell                                  | 1a  | 2 | X | 3 | O              |           |                        |                         |                          |               |               |           |                        |               |              | O                  |
| 22   | F      | Clear cell                                  | 2a  | X | X | 3 |                | O         |                        |                         | O                        |               |               |           |                        |               |              | O                  |
| 23   | F      | Clear cell                                  | 1a  | X | X | 2 |                |           |                        |                         | O                        |               |               |           |                        |               |              |                    |
| 24   | M      | Clear cell                                  | 2   | X | X | 2 |                |           |                        |                         | O                        |               |               |           |                        |               |              |                    |
| 25   | F      | Clear cell                                  | 1a  | X | X | 2 |                |           |                        |                         | O                        |               |               |           |                        |               |              |                    |
| 26   | F      | Clear cell                                  | 3b  | X | X | 3 | O              |           |                        |                         | O                        |               |               |           |                        |               |              | O                  |
| 28   | F      | Clear cell                                  | 3b  | 0 | X | 4 |                |           |                        |                         | O                        |               |               |           |                        |               |              |                    |
| 30   | M      | Clear cell                                  | 1b  | X | X | 2 |                |           |                        |                         | O                        |               |               |           |                        |               |              |                    |
| 31   | M      | Clear cell                                  | 1b  | X | X | 3 |                |           |                        |                         | O                        |               |               |           |                        |               |              |                    |
| 35   | M      | Clear cell                                  | 1a  | X | X | 2 |                |           |                        |                         | O                        |               |               |           |                        |               |              |                    |
| 36   | M      | Clear cell                                  | 3b  | X | X | 2 |                |           |                        |                         | O                        |               |               |           |                        |               |              |                    |
| 37   | M      | Clear cell                                  | 1a  | X | X | 2 |                | O         |                        |                         | O                        |               |               |           |                        |               |              |                    |
| 38   | M      | Clear cell                                  | 1b  | X | X | 2 |                |           | O                      |                         | O                        |               |               |           |                        |               |              |                    |
| 40   | M      | Clear cell                                  | 3a  | X | X | 3 |                |           | O                      |                         | O                        |               |               |           |                        |               |              |                    |
| 42   | F      | Clear cell                                  | 3b  | X | X | 3 |                |           | O                      |                         | O                        |               |               |           | O                      |               |              |                    |
| 43   | F      | Clear cell                                  | 3b  | X | X | 3 | O              |           |                        |                         | O                        |               |               |           | O                      |               |              | O                  |
| 48   | F      | Clear cell                                  | 1b  | X | X | 3 |                |           |                        | O                       | O                        |               |               |           | O                      |               |              |                    |
| 49   | F      | Clear cell                                  | 3a  | 1 | X | 3 |                |           |                        | O                       | O                        | O             |               |           | O                      |               |              |                    |
| 52   | M      | Clear cell                                  | 1a  | X | X | 3 |                |           |                        | O                       | O                        |               |               |           |                        |               |              |                    |
| 53   | M      | Clear cell                                  | 3c  | X | X | 3 |                |           |                        | O                       | O                        |               |               |           |                        |               |              |                    |
| 55   | F      | Clear cell                                  | 3b  | X | X | 3 |                |           |                        | O                       |                          |               |               |           |                        |               |              |                    |
| 57   | M      | Clear cell                                  | 1a  | X | X | 2 |                |           |                        | O                       |                          |               |               |           |                        |               |              |                    |
| 58   | F      | Clear cell                                  | 3a  | X | X | 2 |                | O         | O                      | O                       |                          |               |               |           |                        |               |              |                    |
| 60   | M      | Clear cell                                  | 3a  | 0 | X | 3 |                |           | O                      |                         |                          |               |               |           |                        |               |              |                    |
| 61   | M      | Clear Cell with sarcomatoid differentiation | 3a  | 0 | X | 3 |                | O         | O                      |                         |                          |               |               |           |                        |               |              |                    |
| 62   | F      | Clear cell                                  | 1b  | X | X | 2 |                | O         | O                      | O                       |                          |               |               |           |                        |               |              |                    |
| 63   | M      | Clear cell                                  | 3a  | 0 | X | 4 |                |           |                        | O                       |                          |               |               |           |                        |               |              |                    |
| 64   | F      | Clear cell                                  | 1a  | X | X | 2 |                | O         | O                      | O                       |                          |               |               |           |                        |               |              |                    |
| 65   | F      | Clear cell                                  | 3a  | 0 | X | 2 |                | O         | O                      | O                       | O                        | O             |               |           |                        |               |              |                    |
| 66   | n.s.   | Clear cell                                  | 3a  | 0 | X | 3 |                | O         | O                      |                         |                          |               |               |           |                        |               |              |                    |
| 67   | M      | Clear cell                                  | 4   | 0 | 1 | 2 |                | O         | O                      | O                       |                          |               |               |           | O                      |               |              |                    |
| 68   | F      | Clear cell                                  | 2a  | 0 | X | 2 |                | O         | O                      |                         |                          |               |               |           |                        |               |              |                    |
| 69   | F      | Clear cell                                  | 3a  | X | X | 2 |                | O         | O                      | O                       |                          |               |               |           |                        |               |              |                    |
| 70   | M      | Clear cell                                  | 3a  | X | X | 3 |                | O         | O                      | O                       |                          |               |               |           | O                      |               |              |                    |
| 71   | F      | Clear cell                                  | 1b  | X | X | 2 |                | O         | O                      |                         |                          |               |               |           |                        |               |              |                    |
| 72   | M      | Clear cell with focal rhabdoid features     | 3a  | 0 | X | 4 |                | O         | O                      |                         |                          |               |               |           |                        |               |              |                    |
| 73   | F      | Clear cell, with focal rhabdoid features    | 2a  | 0 | 1 | 3 |                | O         | O                      | O                       |                          |               |               |           |                        |               |              |                    |
| 74   | F      | Clear cell                                  | 1b  | X | X | 2 |                | O         | O                      | O                       |                          |               |               |           |                        |               |              |                    |
| 75   | F      | Clear cell, Gr 3/4, locally recurrent       | --- | X | 1 | 4 | O              | O         | O                      | O                       |                          |               |               |           |                        |               |              |                    |
| 76   | F      | Clear cell                                  | 1a  | X | X | 3 |                | O         | O                      |                         |                          |               |               |           |                        |               |              |                    |
| 78   | F      | Clear cell                                  | 3a  | X | X | 3 | O              | O         | O                      | O                       |                          |               |               |           |                        |               |              | O                  |
| 79   | F      | ccRCC with sarcomatoid differentiation      | 1b  | 1 | X | 4 |                |           |                        | O                       |                          |               |               |           |                        |               |              |                    |
| 81   | M      | Clear cell                                  | 1b  | X | X | 3 |                |           |                        | O                       |                          |               |               |           |                        |               |              |                    |
| 83   | M      | Clear cell                                  | --- | X | X | 2 |                |           |                        | O                       |                          |               |               |           |                        |               |              |                    |
| 87   | M      | Clear cell with sarcomatoid differentiation | 1b  | X | 1 | 4 | O              |           |                        |                         |                          |               |               |           |                        |               |              |                    |
| 88   | F      | Clear cell                                  | 2b  | X | X | 2 | O              |           |                        | O                       |                          |               |               |           |                        |               |              |                    |
| 89   | F      | Clear cell                                  | 1a  | X | X | 2 |                |           |                        |                         |                          |               |               |           |                        |               |              | O                  |
| 94   | M      | Clear cell                                  | 1b  | X | X | 2 | O              |           |                        |                         |                          |               |               |           |                        |               |              |                    |
| 95   | F      | Clear cell                                  | 3a  | X | X | 3 | O              |           |                        |                         |                          |               |               |           |                        |               |              |                    |
| 99   | M      | Clear cell                                  | 3a  | X | X | 2 | O              |           |                        |                         |                          |               |               |           |                        |               |              |                    |
| 101  | F      | Clear cell                                  | 1b  | X | X | 1 | O              |           |                        |                         |                          |               |               |           |                        |               |              |                    |
| 110  | F      | Clear cell                                  | 3b  | 0 | 0 | 3 | O              |           |                        |                         |                          |               |               |           |                        |               |              | O                  |
| 114  | M      | Clear cell                                  | 3b  | 0 | 0 | 3 | O              |           |                        | O                       |                          |               |               |           |                        |               |              |                    |
| 115  | M      | Clear cell                                  | 3a  | 1 | X | 3 | O              |           |                        | O                       | O                        |               |               |           |                        |               |              |                    |
| 119  | M      | Clear cell                                  | 1b  | X | X | 3 | O              |           |                        |                         |                          |               |               |           |                        |               |              |                    |
| 126  | M      | Clear cell                                  | 1b  | X | X | 3 |                | O         |                        |                         |                          |               |               |           |                        |               |              |                    |
| 128  | F      | Clear cell                                  | 1b  | 0 | X | 3 |                | O         |                        |                         |                          |               |               |           |                        |               |              |                    |
| 130  | F      | Clear cell                                  | 2b  | X | X | 3 | O              | O         |                        |                         |                          | O             |               |           |                        |               |              | O                  |

**Table S1. Patient Samples Employed in This Study (Continued)**

| RCC# | Gender | Reported Histology                          | T   | N   | M | G   | Flow cytometry | Cell line | Subcutaneous fragments | Renal capsule fragments | Renal capsule injections | Co-injections | Clonogenicity | Annexin-V | Caspase/TUNEL staining | Apoikis-ROCKi | Lysis buffer | Immunofluorescence |
|------|--------|---------------------------------------------|-----|-----|---|-----|----------------|-----------|------------------------|-------------------------|--------------------------|---------------|---------------|-----------|------------------------|---------------|--------------|--------------------|
|      |        |                                             |     |     |   |     |                |           |                        |                         |                          |               |               |           |                        |               |              |                    |
| 132  | F      | Clear cell                                  | -   | -   | 1 | 2   | O              |           |                        |                         |                          |               |               |           |                        |               |              |                    |
| 137  | M      | Clear cell                                  | 1b  | X   | X | 1   | O              |           |                        |                         |                          |               |               |           |                        |               |              | O                  |
| 138  | M      | Clear cell                                  | 2   | X   | X | 2   | O              |           |                        |                         |                          |               |               |           |                        |               |              | O                  |
| 149  | M      | Clear cell                                  | 1b  | X   | X | 2   | O              |           |                        |                         |                          |               |               |           |                        |               |              |                    |
| 152  | F      | Clear cell                                  | 4   | 0   | X | 2   | O              |           |                        |                         |                          |               |               |           |                        |               |              |                    |
| 157  | F      | Clear cell                                  | 2a  | X   | X | 3   | O              |           |                        |                         |                          |               |               |           |                        |               |              |                    |
| 158  | M      | Clear cell                                  | 3a  | 0   | X | 3   | O              |           |                        |                         |                          |               |               |           |                        |               |              |                    |
| 160  | M      | Clear cell                                  | 3a  | 0   | X | 1   | O              |           |                        |                         |                          | O             |               |           |                        |               |              |                    |
| 164  | n.s.   | Clear cell                                  | 3a  | 0   | X | 2   | O              |           |                        |                         |                          |               |               |           |                        |               |              |                    |
| 165  | F      | Clear cell                                  | 1b  | X   | X | 2   | O              |           |                        |                         |                          |               |               |           |                        |               |              |                    |
| 169  | M      | Clear cell                                  | 1b  | 0   | X | 3   | O              |           |                        |                         |                          | O             |               |           |                        |               |              |                    |
| 171  | M      | Clear cell                                  | 3a  | X   | X | 2   | O              |           |                        |                         |                          | O             |               |           |                        |               |              |                    |
| 174  | F      | Clear cell                                  | 3a  | X   | X | 3   | O              |           |                        |                         |                          |               |               |           |                        |               |              |                    |
| 175  | F      | Clear cell                                  | 1b  | X   | X | 2   | O              |           |                        |                         |                          |               |               |           |                        |               |              |                    |
| 177  | M      | Clear cell                                  | 1a  | X   | X | 2   | O              |           |                        |                         |                          |               |               |           |                        |               |              |                    |
| 178  | M      | Clear cell                                  | 1b  | X   | X | 3   | O              |           |                        |                         |                          |               |               |           |                        |               |              |                    |
| 179  | F      | Clear cell                                  | 1a  | X   | X | 3   | O              |           |                        |                         |                          |               |               |           |                        |               |              |                    |
| 187  | M      | Clear cell                                  | 1b  | X   | X | 2   | O              |           |                        |                         |                          | O             |               |           |                        |               |              |                    |
| 197  | F      | Clear cell                                  | 1a  | X   | X | 2   | O              |           |                        |                         |                          |               |               |           |                        |               |              |                    |
| 200  | F      | Clear cell                                  | 1b  | X   | X | 2   | O              |           |                        |                         |                          |               |               |           |                        |               |              | O                  |
| 204  | F      | Clear cell                                  | 2a  | X   | X | 2   | O              |           |                        |                         |                          |               |               |           |                        |               |              |                    |
| 206  | M      | Clear cell                                  | 1a  | X   | X | 3   | O              |           |                        |                         |                          |               |               |           |                        |               |              |                    |
| 222  | M      | Clear cell                                  | 1b  | 0   | X | 2   | O              |           |                        |                         |                          |               |               |           |                        |               |              |                    |
| 225  | M      | Clear cell                                  | 3b  | X   | X | 3   | O              |           |                        |                         |                          |               |               |           |                        |               |              | O                  |
| 226  | F      | Clear cell                                  | 1b  | 0   | X | 2   | O              |           |                        |                         |                          |               |               |           |                        |               |              |                    |
| 229  | F      | Clear cell, metastatic to pancreas          | --- | X   | 1 | --- | O              |           |                        |                         |                          | O             |               |           |                        |               |              |                    |
| 238  | M      | Clear cell                                  | 3a  | X   | X | 2   | O              |           |                        |                         |                          |               |               |           |                        |               |              | O                  |
| 243  | F      | Clear cell                                  | 4   | X   | 1 | 2   | O              |           |                        |                         |                          |               |               |           |                        |               |              |                    |
| 252  | M      | Clear cell                                  | 1b  | X   | X | 3   | O              |           |                        |                         |                          |               |               |           |                        |               |              | O                  |
| 266  | F      | Clear cell                                  | 3a  | 1   | X | 3   | O              |           |                        |                         |                          |               |               |           |                        |               |              | O                  |
| 267  | M      | Clear cell with sarcomatoid differentiation | 4   | 0   | X | 3   | O              |           |                        |                         |                          |               |               |           |                        |               |              |                    |
| 271  | M      | Clear cell                                  | 1b  | 0   | X | 4   | O              |           |                        |                         |                          |               |               |           |                        |               |              | O                  |
| 275  | M      | Clear cell, G3 with focal G4                | 2a  | 0   | X | 3/4 | O              |           |                        |                         |                          |               |               |           |                        |               |              |                    |
| 278  | F      | Clear cell                                  | 2a  | X   | X | 2   | O              |           |                        |                         |                          |               |               |           |                        |               |              |                    |
| 279  | M      | Clear cell, metastatic                      | --- | --- | 1 | --- | O              |           |                        |                         |                          |               |               |           |                        |               |              |                    |
| 284  | M      | Clear cell                                  | 2b  | X   | X | 2   | O              |           |                        |                         |                          |               |               |           |                        |               |              |                    |
| 285  | F      | Clear cell                                  | 3a  | X   | X | 2   | O              |           |                        |                         |                          |               |               |           |                        |               |              |                    |
| 323  | M      | Clear cell                                  | 1   | 1a  | X | X   |                | O         |                        |                         |                          |               |               |           |                        |               |              |                    |
| 371  | F      | Clear cell                                  | 2   | 1b  | X | X   |                |           |                        |                         |                          | O             | O             |           | O                      |               |              |                    |
| 375  | M      | Papillary type 1                            | 2   | 1b  | X | X   |                |           |                        |                         |                          |               |               |           | O                      |               |              |                    |
| 378  | M      | Clear cell                                  | 2   | 1b  | X | X   |                |           |                        |                         |                          |               | O             |           | O                      |               |              |                    |
| 379  | F      | Clear cell                                  | 1   | 1a  | X | X   |                |           |                        |                         |                          | O             |               |           |                        |               |              |                    |
| 380  | M      | Clear cell, metastatic to pancreas          | --- | --- | 1 | --- | O              |           |                        |                         |                          |               |               |           |                        |               |              |                    |
| 382  | M      | Chromophobe                                 | 1b  | X   | X | X   |                |           |                        |                         |                          |               |               |           |                        | O             |              |                    |
| 384  | M      | Clear cell, metastatic to oral cavity       | --- | --- | 1 | --- | O              |           |                        |                         |                          |               |               |           |                        |               |              |                    |
| 390  | F      | Clear cell, metastatic to lung              | 1   | 1b  | 1 | --- | O              |           |                        |                         |                          |               |               |           |                        |               |              |                    |
| 404  | M      | Clear cell, metastatic to R adrenal gland   | --- | --- | 1 | --- | O              |           |                        |                         |                          |               |               |           |                        |               |              |                    |
| 405  | F      | Clear cell, metastatic                      | --- | --- | 1 | --- | O              |           |                        |                         |                          |               |               |           |                        |               |              |                    |
| 410  | F      | Urothelial                                  | hig | 3   | 1 | X   |                |           |                        |                         |                          |               |               |           |                        | O             |              |                    |
| 421  | M      | Clear cell                                  | ib  | 0   | X | 2   |                |           |                        |                         |                          | O             | O             |           |                        |               | O            |                    |
| 422  | F      | Clear cell                                  | 2a  | X   | X | 2   |                |           |                        |                         |                          | O             | O             |           |                        |               | O            |                    |
| 424  | M      | Clear cell                                  | 1a  | X   | X | 2   |                |           |                        |                         |                          | O             | O             |           |                        |               | O            |                    |
| 425  | M      | Clear cell                                  | 3a  | X   | X | 2   |                |           |                        |                         |                          | O             | O             |           |                        |               | O            |                    |
| 429  | M      | Chromophobe                                 | 2a  | 0   | X | --- | O              |           |                        |                         |                          |               |               |           |                        | O             |              |                    |
| 430  | M      | Clear cell                                  | 3a  | X   | 1 | 3   |                |           |                        |                         |                          |               |               |           |                        | O             |              |                    |
| 434  | M      | Clear cell                                  | 1a  | X   | X | 1   |                |           |                        |                         |                          | O             | O             |           | O                      |               |              |                    |
| 436  | M      | Clear cell, rhabdoid                        | 1a  | X   | X | 4   |                |           |                        |                         |                          | O             | O             |           | O                      |               |              |                    |
| 437  | F      | Papillary                                   | 1a  | 0   | X | --- |                |           |                        |                         |                          |               |               |           | O                      |               |              |                    |
| 438  | M      | Clear cell                                  | 1b  | X   | X | 2   |                |           |                        |                         |                          | O             | O             |           | O                      |               |              |                    |

T: T stage; N: nodal status; M: metastasis; G: grade; X: clinical stage not known from pathology specimen; n.s.: not specified



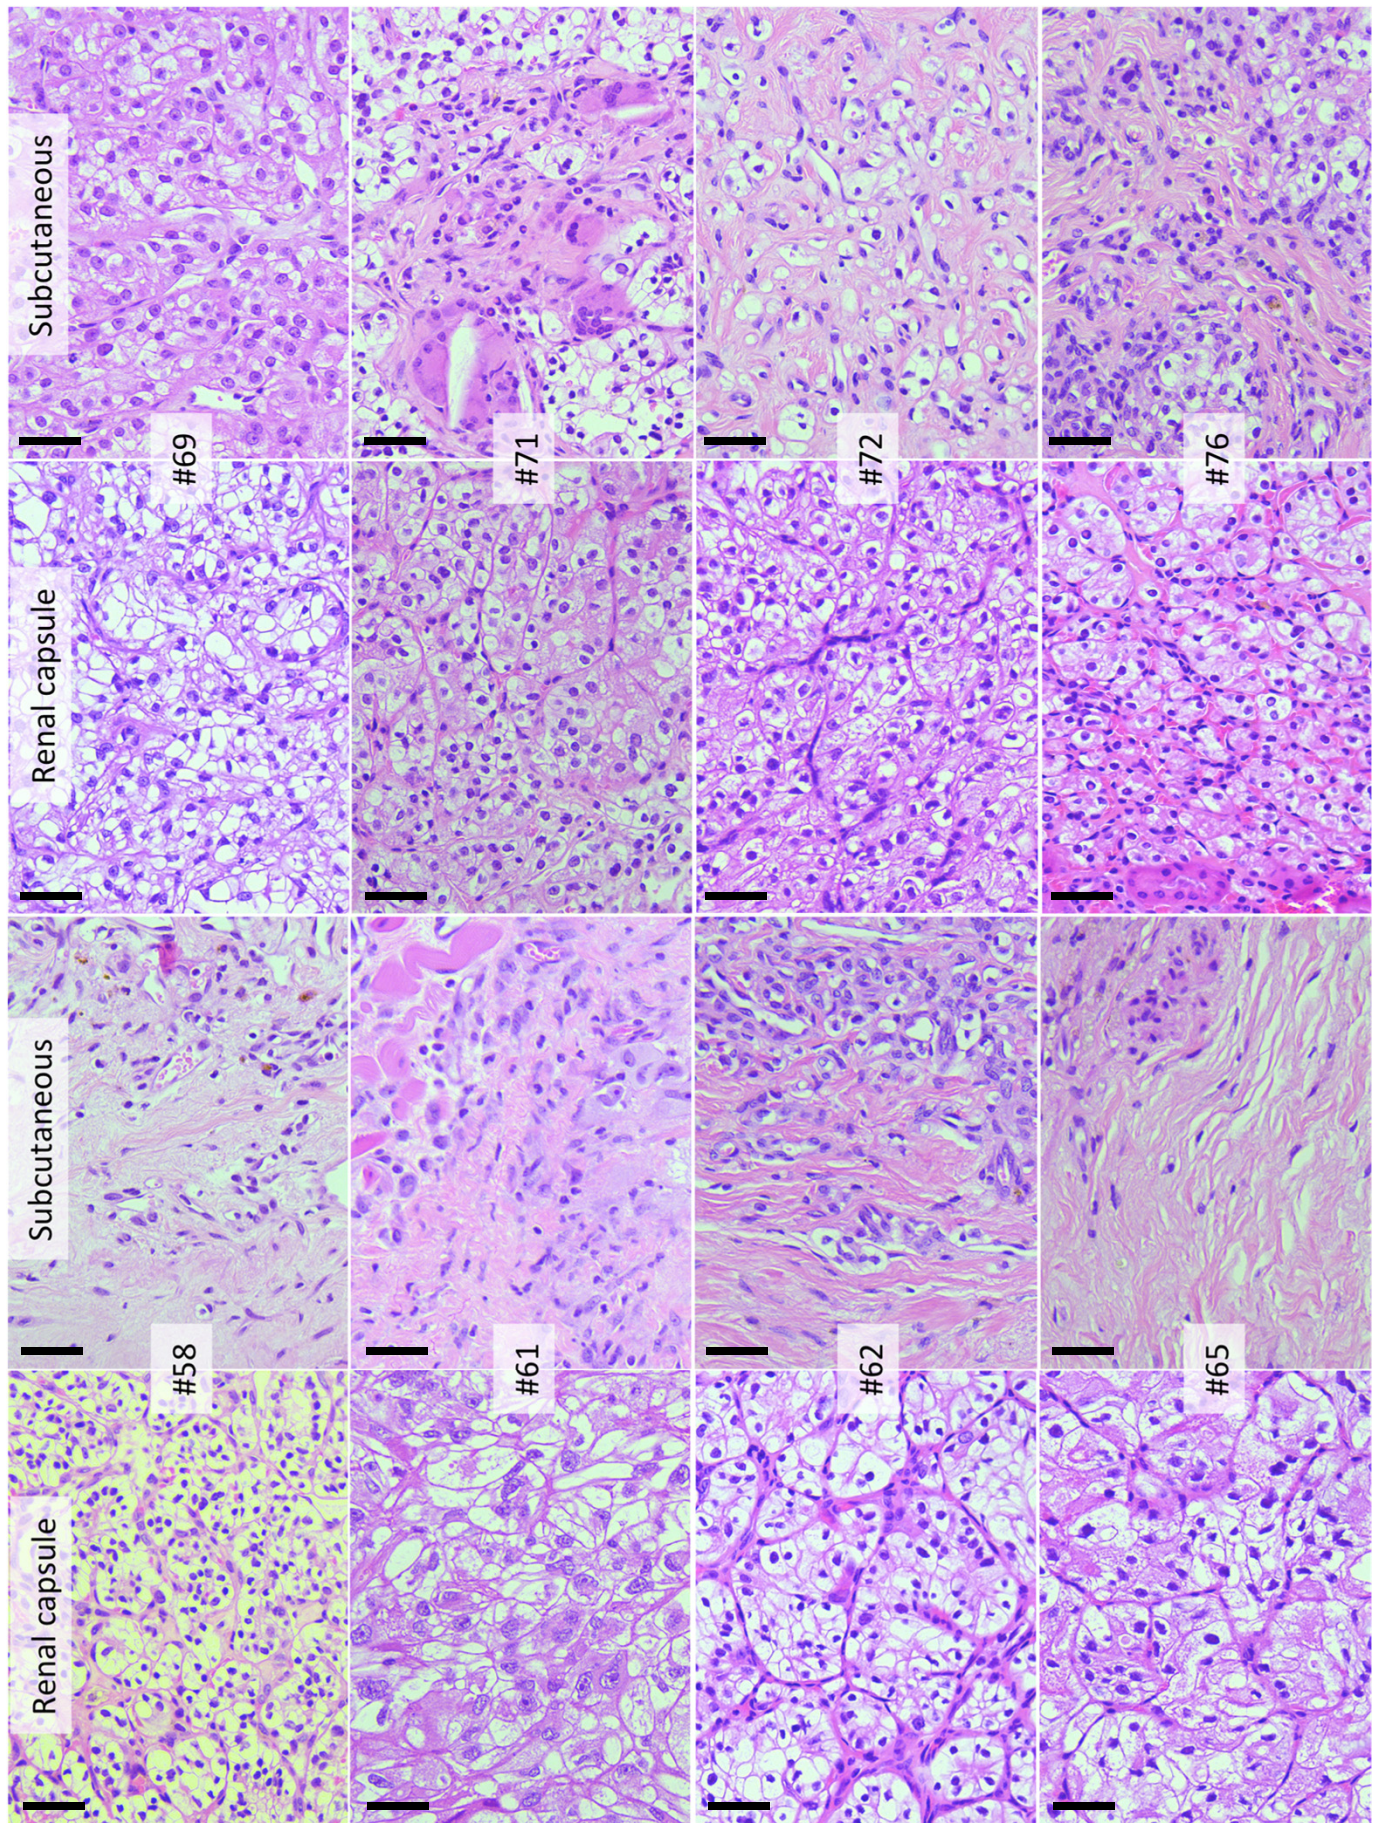

**Supplementary Figure 1. Hematoxylin and eosin staining of matched xenografts formed in the renal capsule and subcutaneous space. (scale bars = 50  $\mu$ m, 8 matched cases).**



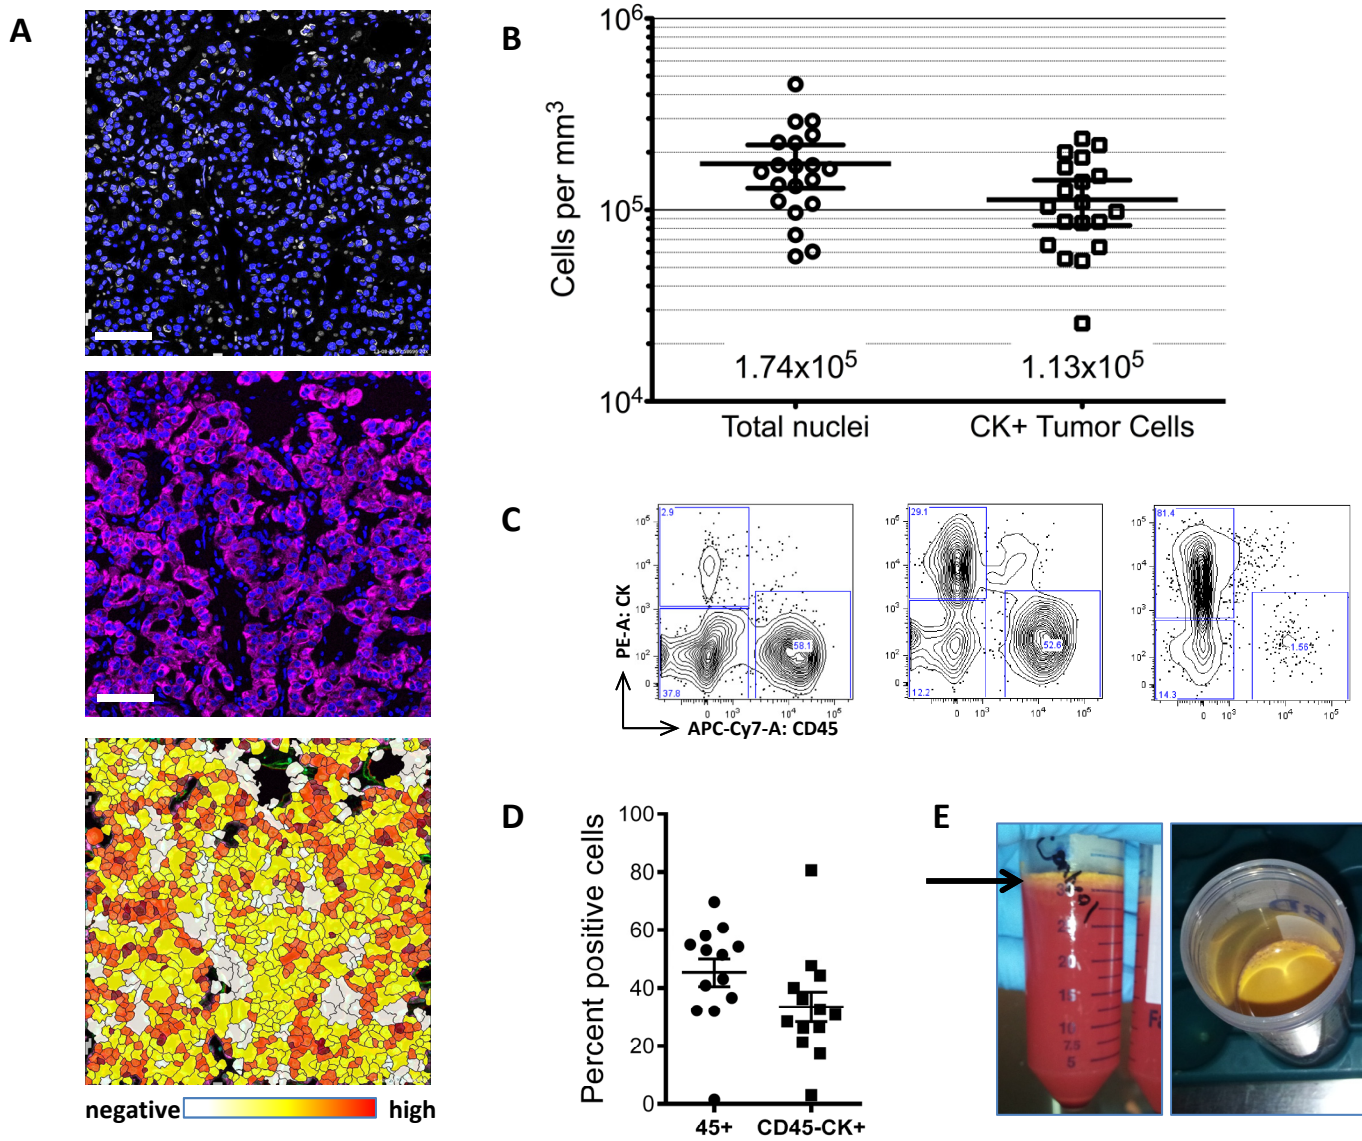

**Supplementary Figure 2. Estimation of cell numbers in tumor fragments and cell suspensions.**

**(A)** Representative ccRCC tissue section stained for nuclei with Hoescht 33342 (blue), and pan-cytokeratin (CK; pink) to estimate tumor and total cell counts (scale bar = 100  $\mu$ m). Top panel, Hoechst alone; middle panel, Hoechst/CK merged image; bottom panel, example of cell counting on Definiens platform, illustrating pan-CK staining. **(B)** The number of cells per field (either total cells or CK+ cells) was used to calculate the number of cells per  $\text{mm}^3$  of tissue. Allowing for  $\sim 2$ -fold shrinkage in formalin-fixed paraffin-embedded tissues<sup>47-51</sup> the mean number of CK+ cancer cells per  $\text{mm}^3$  is  $1.13 \times 10^5$  (range  $2.5 \times 10^4$  to  $2.25 \times 10^5$ ). **(C)** To quantify the number of ccRCC cancer cells in single cell suspensions we performed intracellular flow cytometry using the same pan-CK antibody. Representative FACS plots from 3 patients, with low, medium and high proportions of pan-CK+ cells are shown. **(D)** Data summary from 13 patients analyzed as shown in (C). The mean CD45+ cell frequency in *ex vivo* single cell suspensions is 45.25% ( $\pm 4.8\%$ ; range 1.5% to 69.6%). The mean CD45-CK+ cell frequency is 33.4% ( $\pm 5.1\%$ ; range 2.9% to 80%). **(E)** During processing, a lipid layer appears on the surface of the supernatant (arrow), suggesting 'clear cell' destruction. Horizontal line and error bars in (B) and (D) represent mean  $\pm$  SEM.

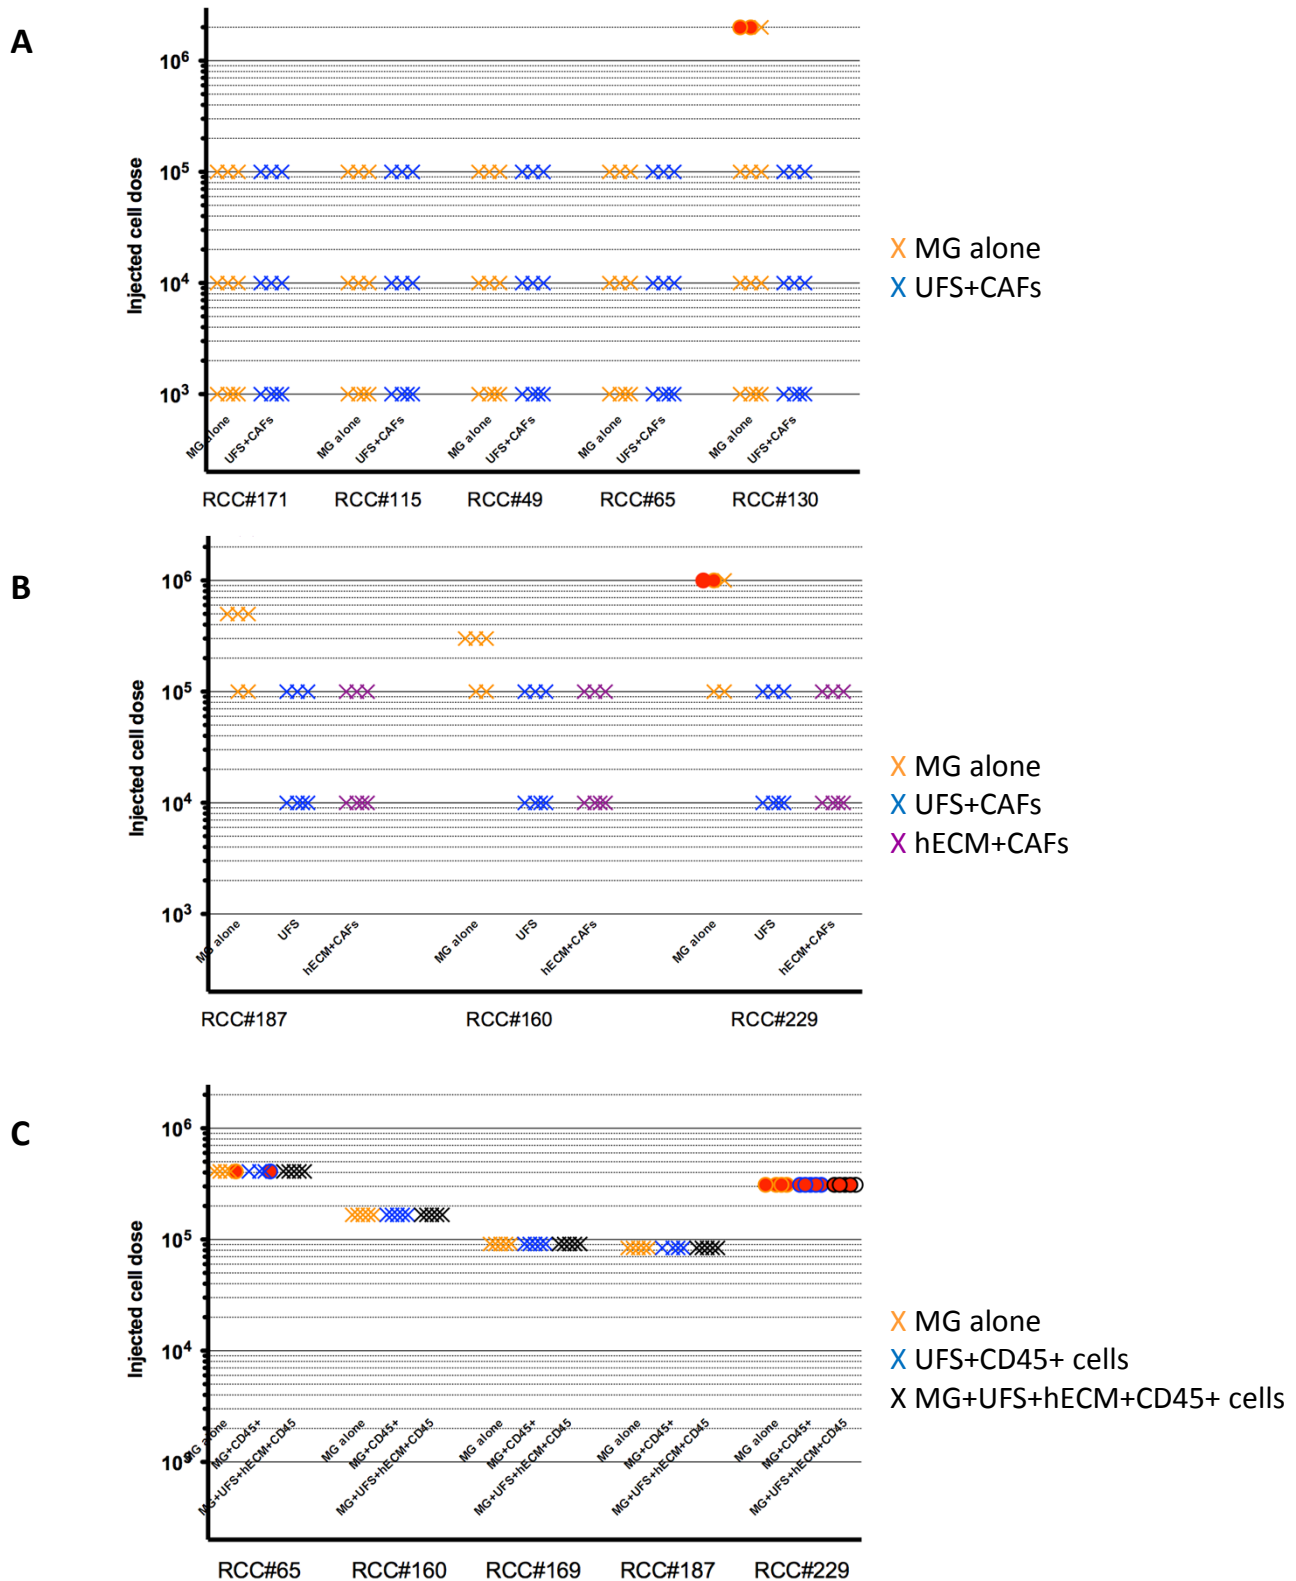

**Supplementary Figure 3. “Humanization” of the mouse microenvironment does not lower the minimum engrafting dose of primary *ex vivo* ccRCC samples. (A and B)** CD45+ cell-depleted ccRCC primary tumor samples were re-supplemented with human tumor microenvironmental components such as UFS alone, CAFs and UFS (A) or CAFs and human placenta-derived extracellular matrix (B) but all failed to form xenografts except at very high doses in control conditions (Matrigel alone). **(C)** Reintroduction of separated autologous CD45+ cells (in the presence or absence of UFS or human ECM) did not influence xenograft formation.

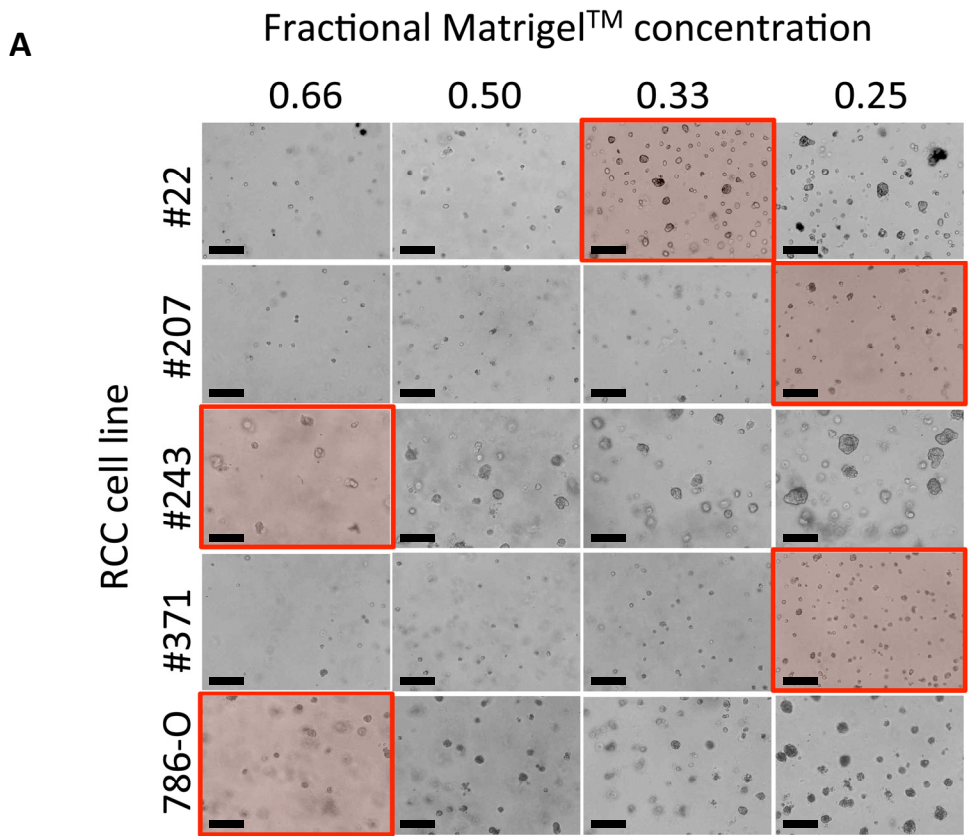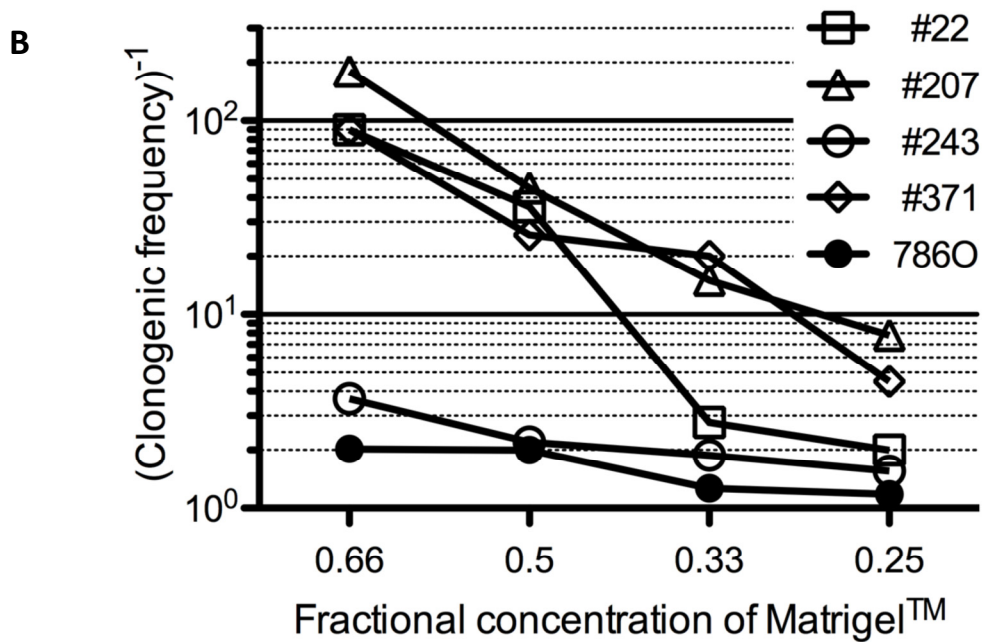

**Supplementary Figure 4. Matrigel™ concentration influences ccRCC cell line clonogenicity.** (A) The maximum concentration of Matrigel™ at which colonies can grow (red boxes) varies between cell lines (scale bars = 100 μm). (B) Cell lines that are known to be tumorigenic (#243, 786-O) are able to form colonies even in high fractional concentrations (0.66) of Matrigel™.



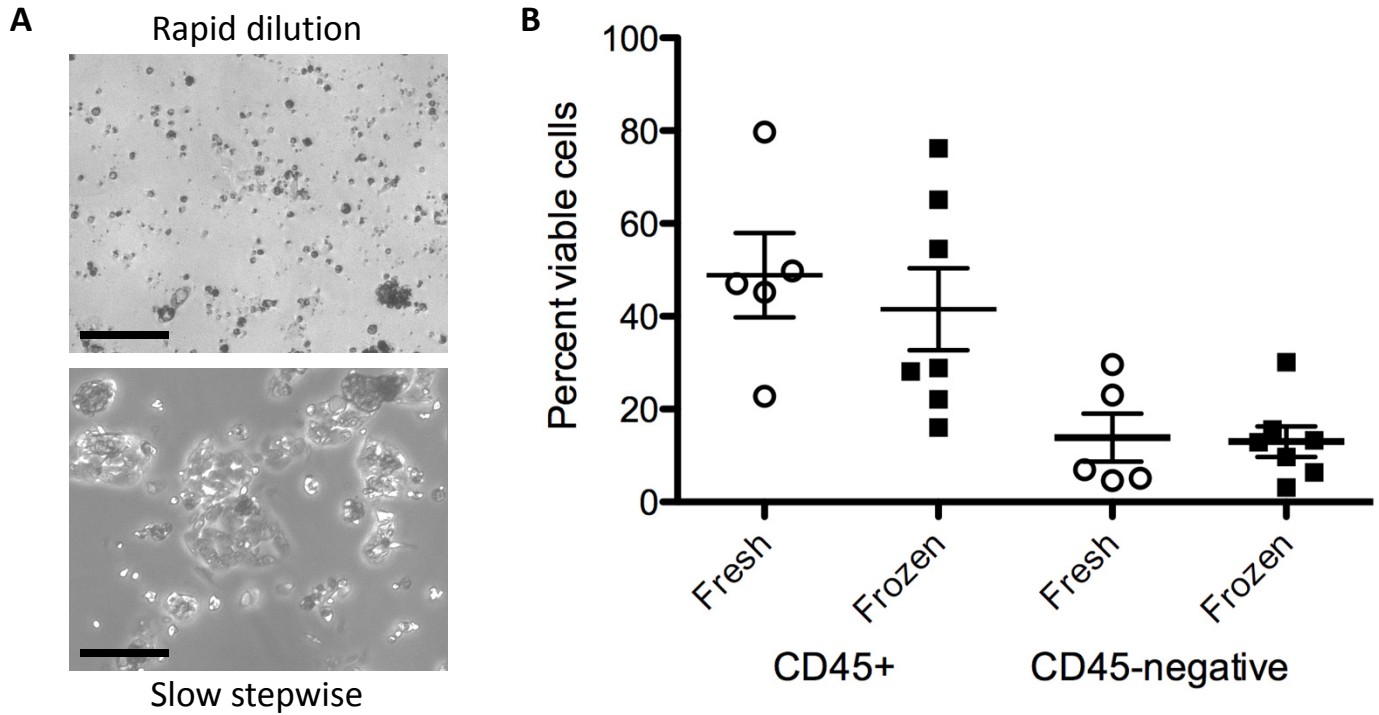

**Supplementary Figure 5. Optimized thawing protocol leads to improved viability of cryopreserved *ex vivo* ccRCC samples.** (A) Cell cultures following rapid thawing at 37°C and rapid dilution (top) vs. cells prepared by rapid thawing followed by stepwise dilution (bottom; see Methods). Slow step-wise thawing preserves cell viability (scale bar = 100  $\mu$ m). (B) The viability of cryopreserved and optimally thawed samples is very similar to freshly dissociated tumor samples (as measured by Annexin-V-FITC negative/DAPI-negative cells). Horizontal line and error bars represent mean  $\pm$  SEM.

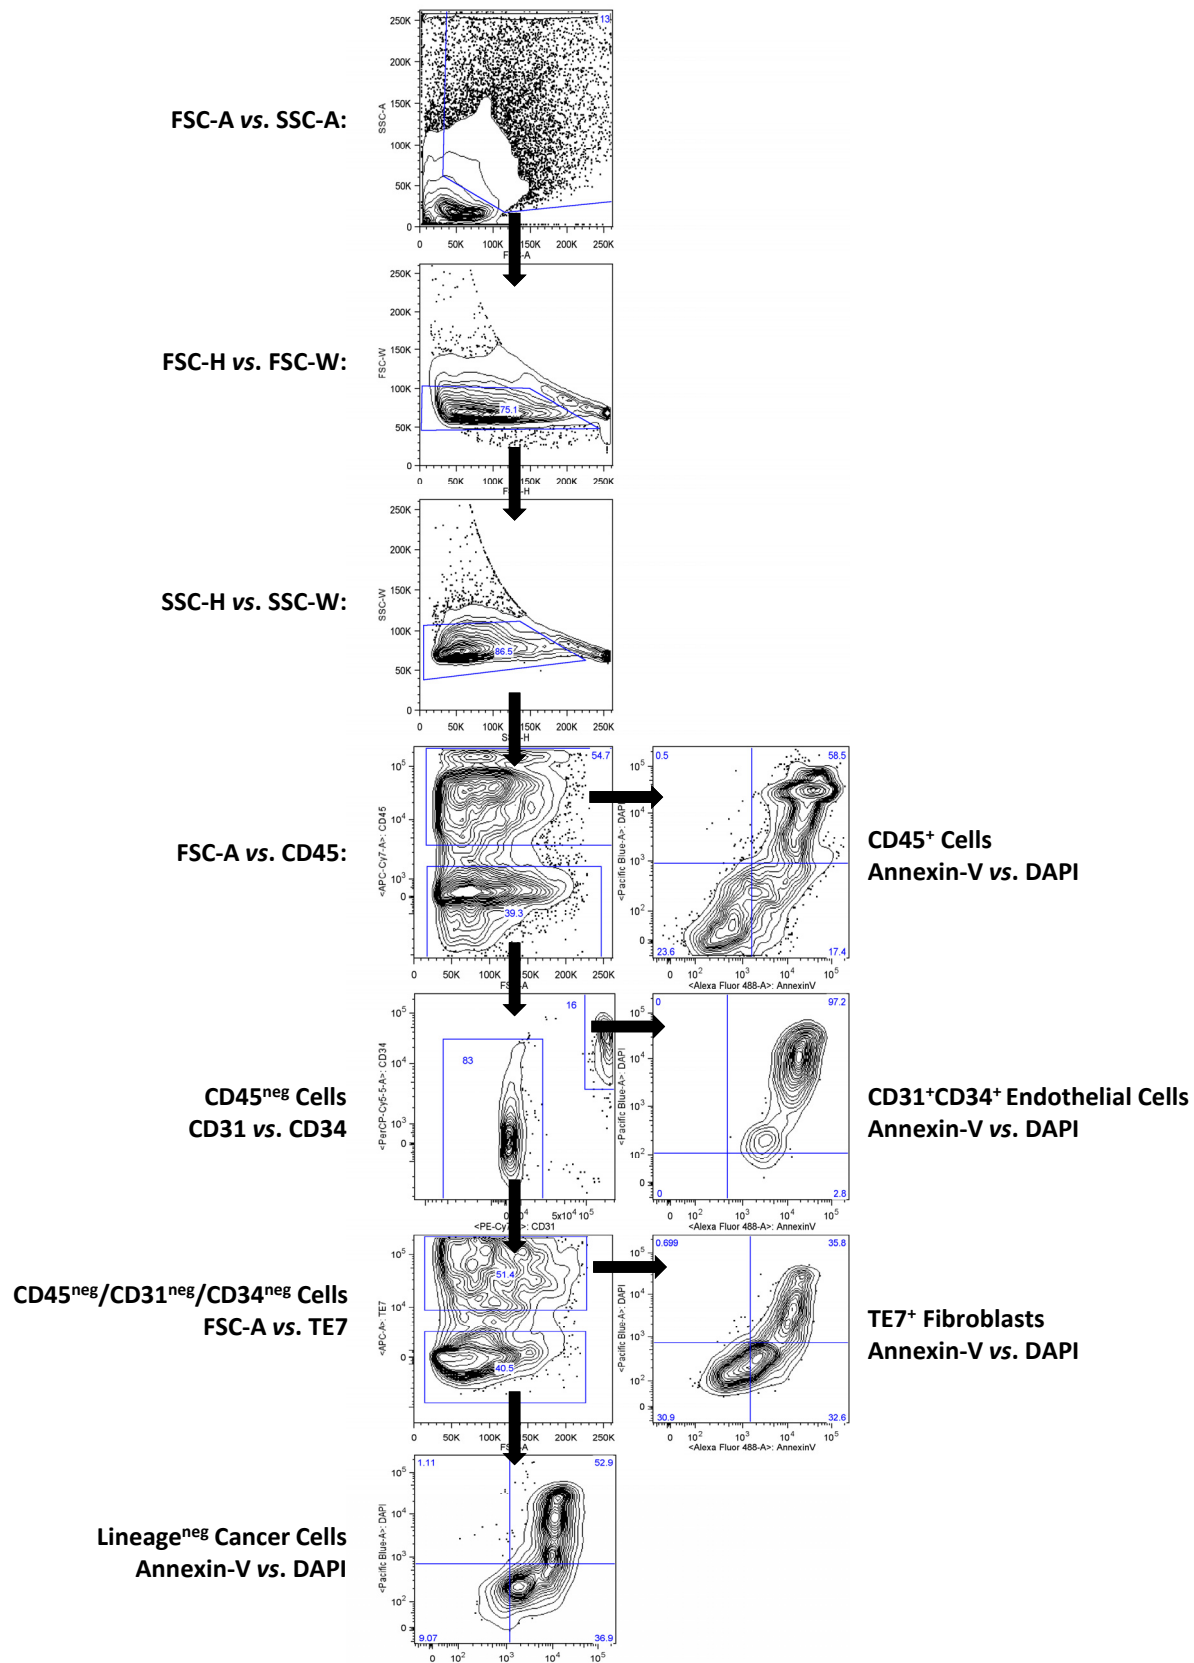

**Supplementary Figure 6. Gating strategy for examining Annexin-V binding and DAPI exclusion vs. cell surface markers.** All gates were set against fluorescence-minus-one (FMO) controls to ensure accurate gating for each population.

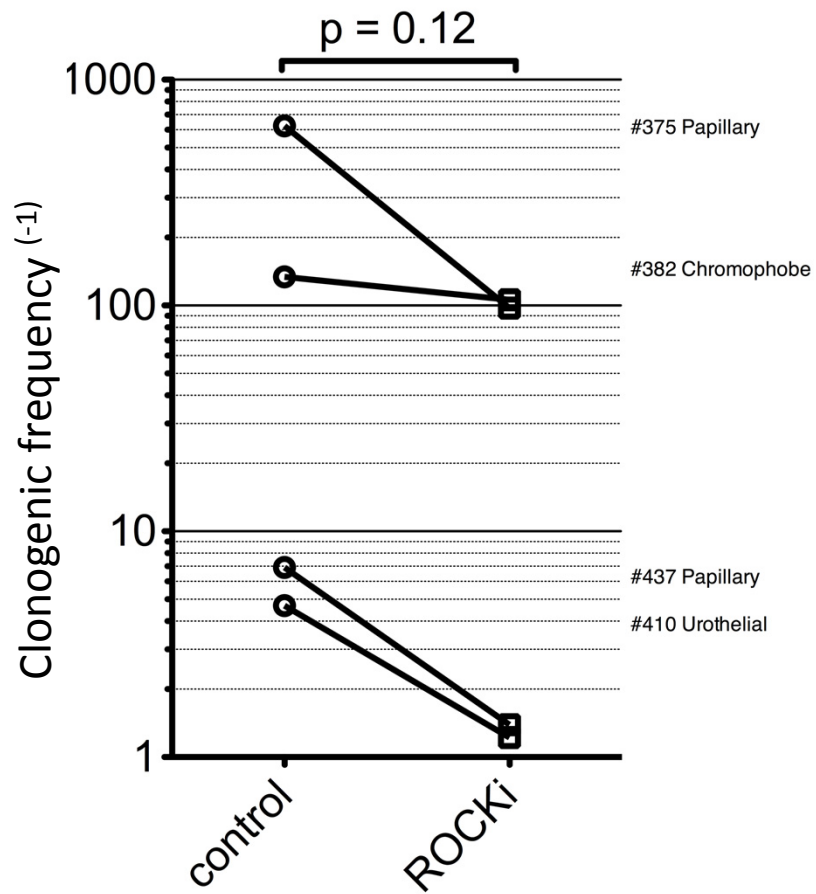

Supplementary Figure 7. Inhibition of anoikis by addition of the ROCK-1 inhibitor Y-27632 shows a trend to increased clonogenicity in non-clear cell renal carcinomas, including papillary, chromophobe and urothelial carcinomas.



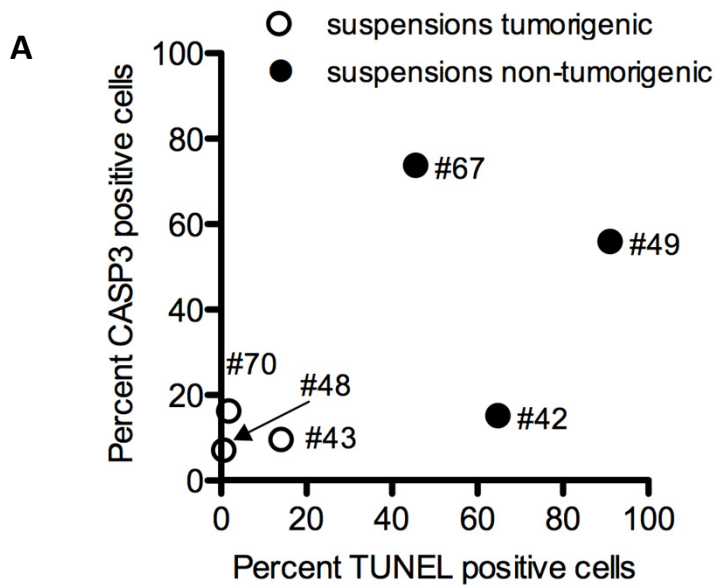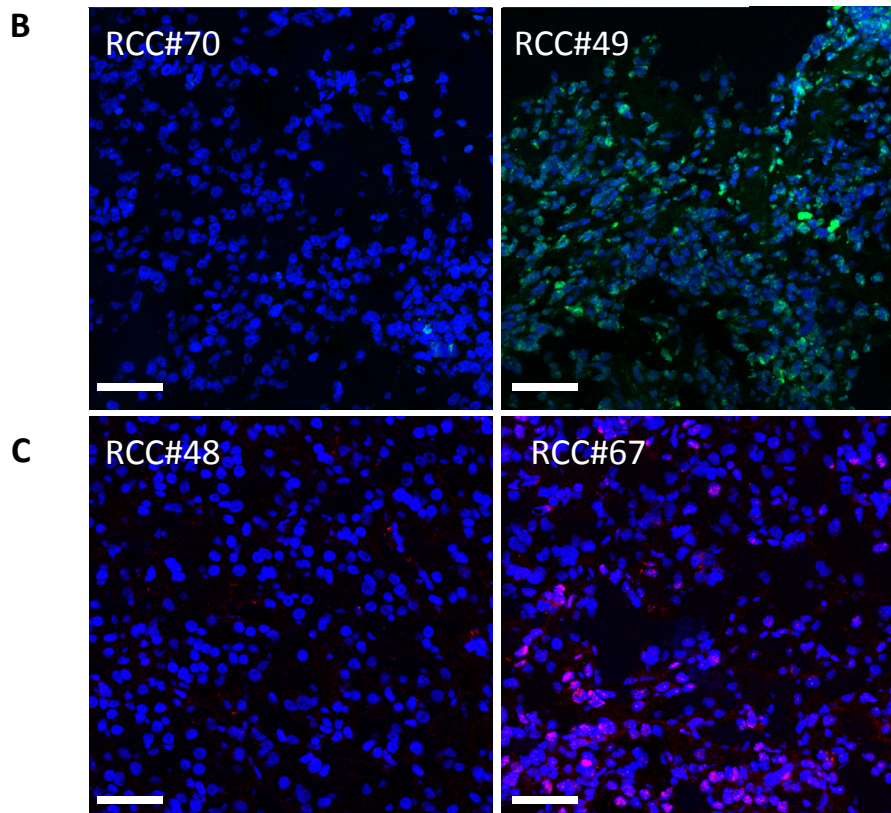

**Supplementary Figure 8. Variable numbers of apoptotic cells are present in tumor tissues prior to tumor processing. (A)** TUNEL and cCASP3 staining was performed on OCT embedded frozen sections of tissues adjacent to processed tumour samples to define tumour viability before tissue dissociation. A wide range of staining frequencies was observed, but interestingly samples that formed xenografts after injection of cell suspensions (#43, #48 and #70) tended to have lower TUNEL and cleaved-caspase 3 staining compared to patient samples where injections were ineffective in forming xenografts (#42, #49, #67). In all these cases xenografts formed from implanted fragments. **(B)** Examples of low (left) and high (right) TUNEL (FITC, #70, #49). **(C)** Examples of low (left) and high (right) cleaved-caspase-3 staining (Cy3, #48, #67). Scale bars = 100  $\mu$ m.

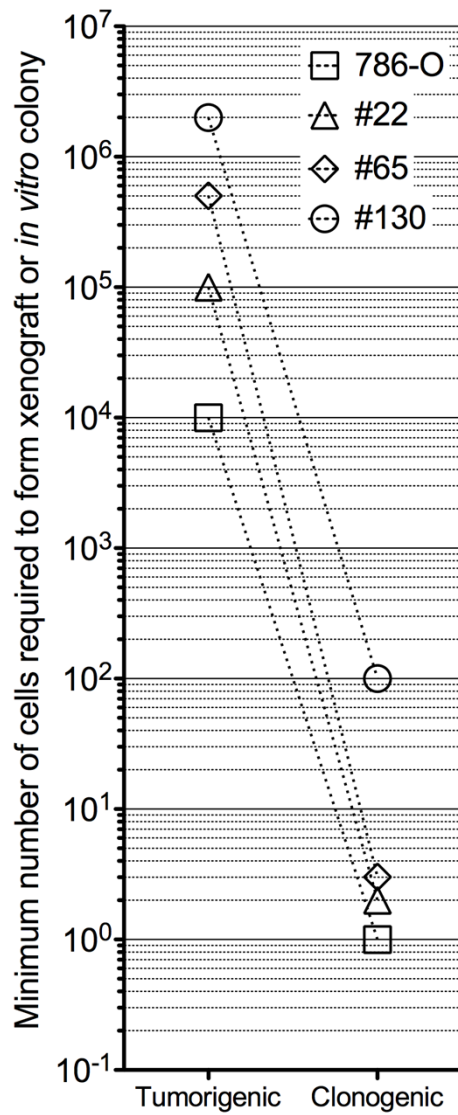

Supplementary Figure 9. Comparison of TIC and clonogenic frequencies in ccRCC cell lines.

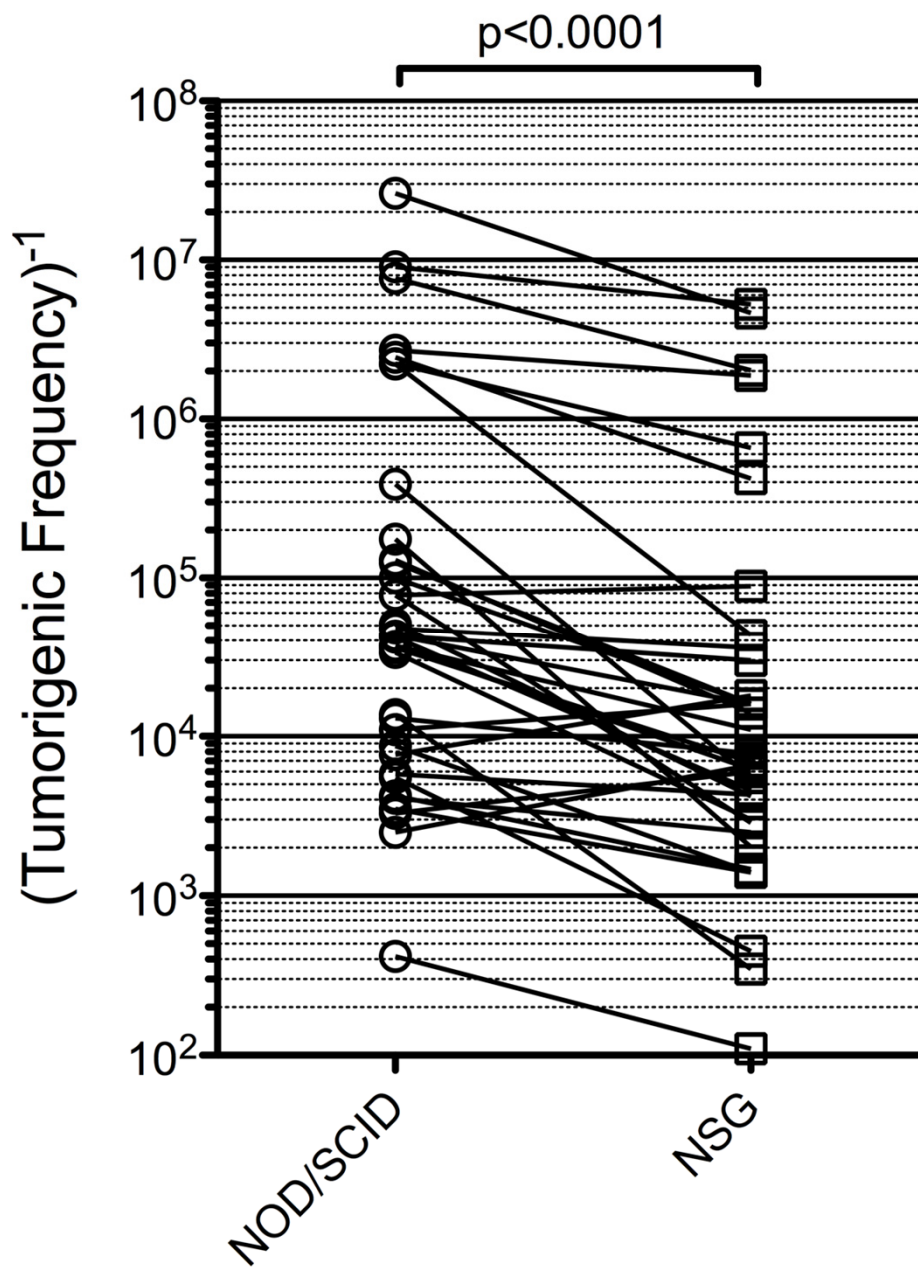

**Supplementary Figure 10. The extent of mouse immunocompromisation alters TIC frequency.** TIC frequency is higher if assayed in NSG versus NOD/SCID mice in ovarian carcinoma<sup>20</sup>, acute myeloid leukemia<sup>36</sup>, pancreatic carcinoma, non-small cell lung cancer and head and neck cancer<sup>6</sup>. TIC frequency was median four-fold higher if measured in NSG mice ( $p < 0.0001$ , paired T-test).



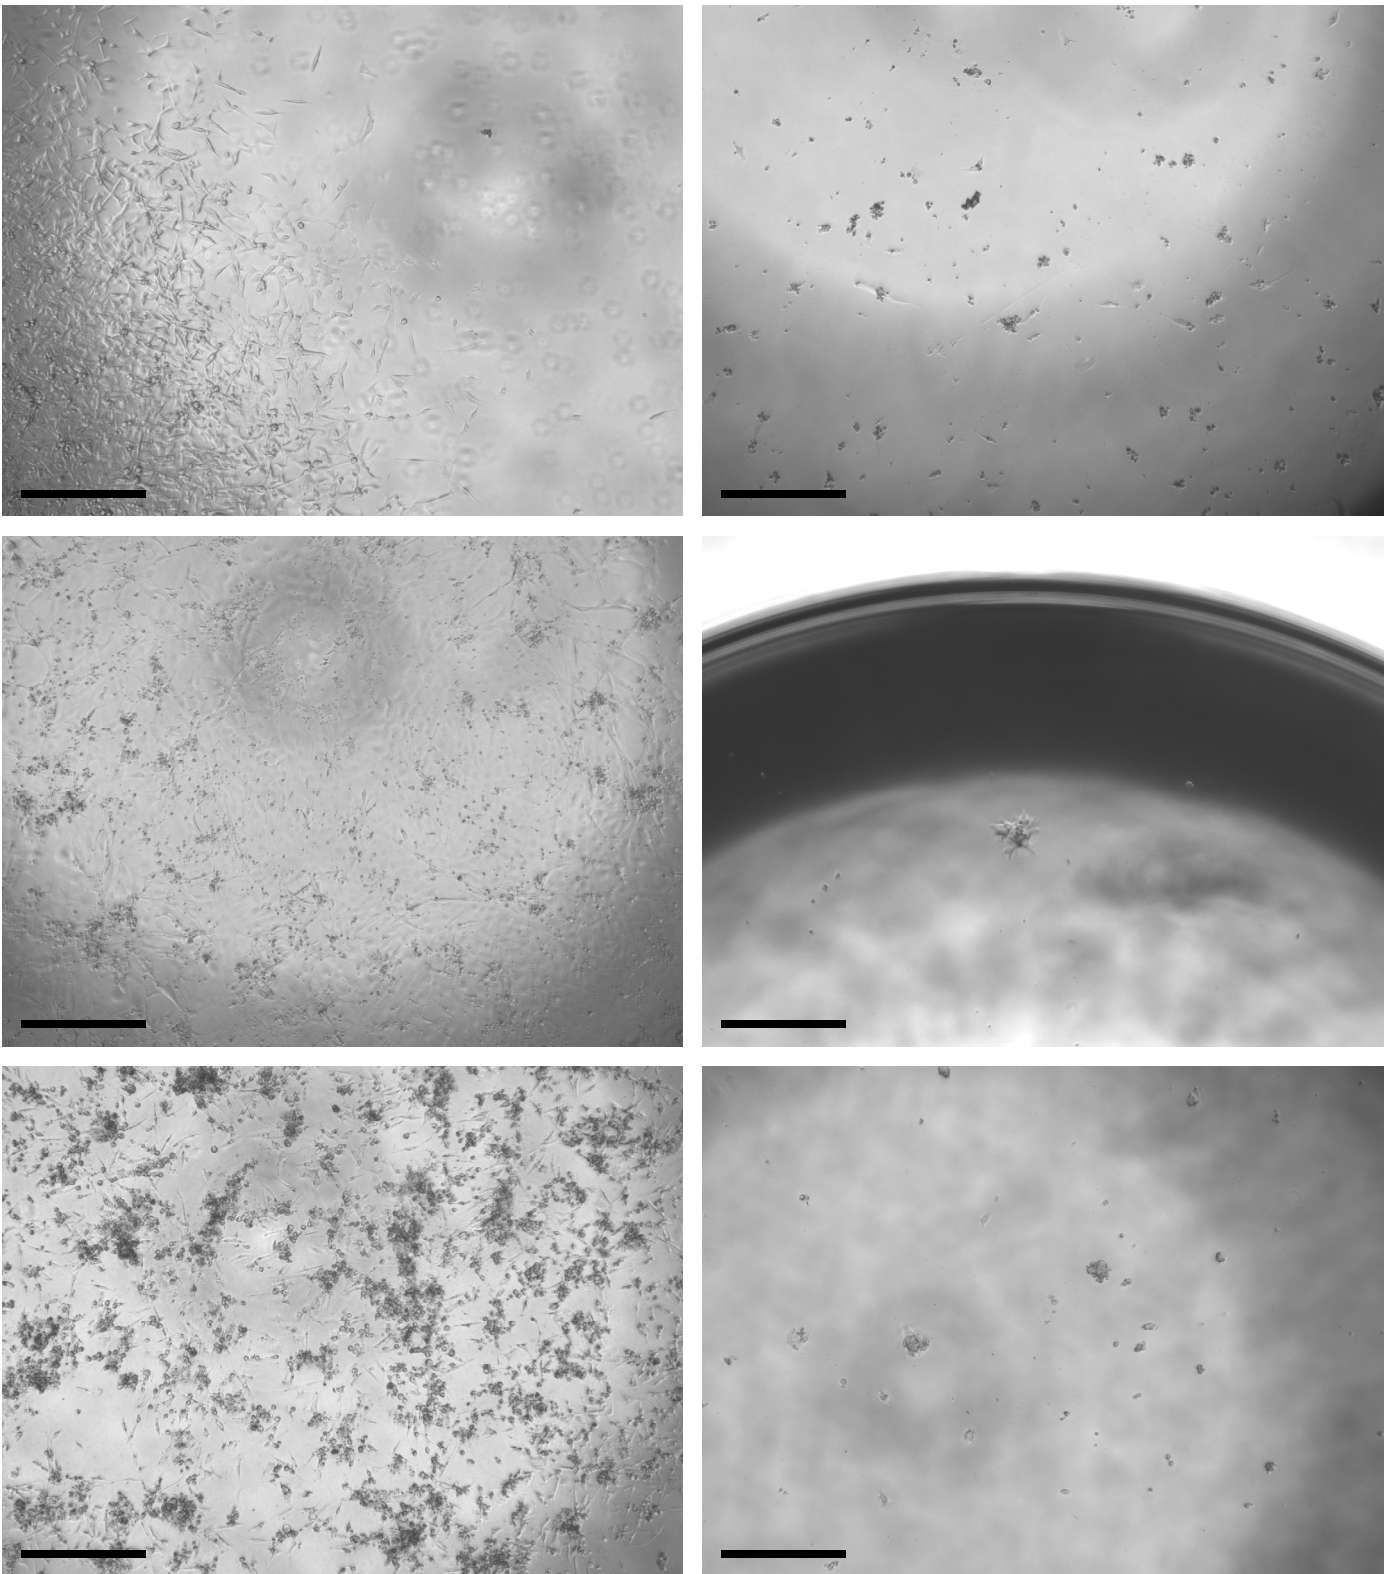

**Supplementary Figure 11. Clonogenic Assays.** Examples of positive (left) and negative (right) wells seeded with 786-0 cells are shown. Scale bars = 100  $\mu$ m.
